# Supplementary material for: Circadian Rhythmicity in Cerebral Microvascular Tone Influences Subarachnoid Hemorrhage–Induced Injury
Source: PubMed Central journal article supplement — Stroke. 2021 Dec 15;53(1):249–59. doi: 10.1161/STROKEAHA.121.036950 (PMC8700310; doi:10.1161/strokeaha.121.036950), 2021-12-15
Supplement: str-53-249-s001.pdf [file str-53-249-s001.pdf]

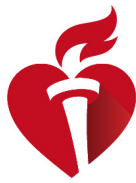

**American  
Stroke  
Association.**  
A division of the  
American Heart Association.

## Acknowledgment Permission Form

**Journal** Stroke

**Manuscript Number** STROKE/2021/036950DR2

**First Author** Darcy Lidington

**Title of Work** A Circadian Rhythm in Cerebral Microvascular Tone Influences Subarachnoid Hemorrhage-Induced Injury

Authors must provide written permission/approval from all individuals mentioned by name in the Acknowledgments section of a submitted manuscript. By signing this form, any and all acknowledged persons therefore state that they have read and approved the mention of their names in the Acknowledgment section of the aforementioned paper.

|           |                                 |           |                                                                                    |      |                    |
|-----------|---------------------------------|-----------|------------------------------------------------------------------------------------|------|--------------------|
| Name (1)  | <u>Alexandra Erin Papaelias</u> | Signature | 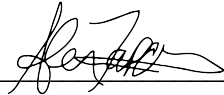 | Date | <u>Nov 4, 2021</u> |
| Name (2)  | _____                           | Signature | _____                                                                              | Date | _____              |
| Name (3)  | _____                           | Signature | _____                                                                              | Date | _____              |
| Name (4)  | _____                           | Signature | _____                                                                              | Date | _____              |
| Name (5)  | _____                           | Signature | _____                                                                              | Date | _____              |
| Name (6)  | _____                           | Signature | _____                                                                              | Date | _____              |
| Name (7)  | _____                           | Signature | _____                                                                              | Date | _____              |
| Name (8)  | _____                           | Signature | _____                                                                              | Date | _____              |
| Name (9)  | _____                           | Signature | _____                                                                              | Date | _____              |
| Name (10) | _____                           | Signature | _____                                                                              | Date | _____              |
| Name (11) | _____                           | Signature | _____                                                                              | Date | _____              |
| Name (12) | _____                           | Signature | _____                                                                              | Date | _____              |
| Name (13) | _____                           | Signature | _____                                                                              | Date | _____              |
| Name (14) | _____                           | Signature | _____                                                                              | Date | _____              |
| Name (15) | _____                           | Signature | _____                                                                              | Date | _____              |
| Name (16) | _____                           | Signature | _____                                                                              | Date | _____              |
| Name (17) | _____                           | Signature | _____                                                                              | Date | _____              |
| Name (18) | _____                           | Signature | _____                                                                              | Date | _____              |
| Name (19) | _____                           | Signature | _____                                                                              | Date | _____              |
| Name (20) | _____                           | Signature | _____                                                                              | Date | _____              |
