# Supplementary material for: Circadian Rhythmicity in Cerebral Microvascular Tone Influences Subarachnoid Hemorrhage–Induced Injury
Source: PubMed Central journal article supplement — Stroke. 2021 Dec 15;53(1):249–59. doi: 10.1161/STROKEAHA.121.036950 (PMC8700310; doi:10.1161/strokeaha.121.036950), 2021-12-15
Supplement: str-53-249-s002.pdf [file str-53-249-s002.pdf]

# SUPPLEMENTAL MATERIAL

## EXPANDED MATERIALS AND METHODS

### Pressure Myography

Mouse olfactory cerebral arteries (a first branch of the anterior cerebral artery) were carefully dissected, cannulated onto micropipettes, stretched to their *in vivo* lengths, pressurized to 45 mmHg and warmed to 37°C. The arteries were imaged with a CCD camera at 40x magnification during myography measurements, with luminal diameter measured using a Crescent Electronics (Windsor, Canada) video edge detector and logged using Photon Technology International FeliX32 analysis software (Horiba Canada Inc.; London, Canada). All functional experiments were conducted in 3-morpholinopropanesulfonic acid (MOPS) buffered saline, with no perfusion ([mmol/L]: NaCl 147.0, KCl 4.7, CaCl<sub>2</sub> 1.5, MgSO<sub>4</sub> 1.2, NaH<sub>2</sub>PO<sub>4</sub> 1.2, pyruvate 2.0, EDTA 0.02, MOPS 3.0 and glucose 5.0; all salts from *BioShop Canada Inc.*, Burlington Canada, cat# SOD002, POC308, CCL444, MAG521, SPM400, PYR302, EDT002, MOP005 and GLU501). Vasomotor responses to 10 μmol/L phenylephrine (*Millipore Sigma*; Oakville, Canada; cat# 6126) provided an assessment of vessel viability at the beginning of each experiment: arteries failing to show ≥30% constriction were excluded.

Myogenic responses were elicited by step-wise 20 mmHg increases in transmural pressure from 20 mmHg to 80mmHg. At each pressure step, vessel diameter ( $dia_{active}$ ) was measured once a steady state was achieved. Following completion of all  $dia_{active}$  measurements, the MOPS buffer was replaced with a Ca<sup>2+</sup>-free version and maximal passive diameter ( $dia_{max}$ ) was recorded at each pressure step. Myogenic tone was calculated as the percent constriction in relation to the maximal diameter at each respective transmural pressure:  $tone (\% \text{ of } dia_{max}) = [(dia_{max} - dia_{active}) / dia_{max}] \times 100$ , where  $dia_{active}$  is the vessel diameter in MOPS containing Ca<sup>2+</sup> and  $dia_{max}$  is the diameter in Ca<sup>2+</sup>-free MOPS. Analyses of vasomotor responses to phenylephrine used the same calculation, only in this case,  $dia_{active}$  represents the vessel diameter at steady state following application of phenylephrine.

### Western Blotting

We utilized a standard western blot procedure for CFTR. Buffer components were purchased from *BioShop Canada Inc.* (cat# in parentheses), including Tris (TRS001), NaCl (SOD002), KCl (POC308), EDTA (EDT002), Triton-X-100 (TRX506), sodium dodecyl sulfate (SDS; SDS003), glycerol (GLY004), β-mercaptoethanol (MER002), dithiothreitol (DTT001), Na<sub>2</sub>HPO<sub>4</sub> (SPD579), K<sub>2</sub>HPO<sub>4</sub> (PPD303), Tween 20 (TWN510), non-fat skim milk (SKI400) and protease inhibitors (PIC004). Cerebral artery lysates were prepared by grinding artery samples in lysis buffer containing 50 mM Tris (pH 7.3), 150 mM NaCl, 2 mM EDTA, 0.1% Triton-X-100, 0.1% SDS and protease inhibitors. Following lysis, the samples were centrifuged (10 minutes at 13,500 g; at 4°C) to remove insoluble material. Immediately prior to polyacrylamide electrophoresis, additional SDS (to 2% final concentration), glycerol (to 2% final concentration), β-mercaptoethanol (to 2% final concentration) and dithiothreitol (2 mM final concentration) were added. Proteins were separated electrophoretically on 7% acrylamide gels and transferred onto polyvinylidene difluoride membranes.

The membranes were blocked for 45 minutes in 5% non-fat skim milk in phosphate-buffered saline containing 137 mM NaCl, 2.7 mM KCl, 10 mM Na<sub>2</sub>HPO<sub>4</sub>, 1.76 mM K<sub>2</sub>HPO<sub>4</sub> and 1% Tween 20 (PBST; pH 7.4) and subsequently incubated overnight at 4°C with primary antibody. For primary antibody treatment, the 100-280 kDa weight range of the blot was incubated with rabbit polyclonal anti-CFTR antibody (1:1,000 in 5% milk/PBST; *Alomone Laboratories*, Jerusalem, Israel; cat# ACL-006), while the remaining range (35-100 kDa) was incubated with mouse monoclonal anti-α-tubulin antibody (1:5,000 in 5% milk/PBST; clone DM1A; *New England Biolabs Canada*; Whitby, Canada; cat# 3873). After washing, the primary antibodies were conjugated with peroxidase-labelled secondary antibody (1:2,000 in 5% milk/PBST) for 2 hours at room temperature:

the CFTR blot received peroxidase-labelled goat anti-rabbit IgG antibody (*New England Biolabs*; cat# 7074) and the tubulin blot received peroxidase-labelled horse anti-mouse IgG antibody (*New England Biolabs*; cat# 7076). The blots were then washed, exposed to chemiluminescence reagent and digitally imaged. High sensitivity chemiluminescence reagent was used for the CFTR blot (*GE Amersham*, Mississauga, Canada; cat# RPN2235) and standard chemiluminescence reagent for the tubulin blot (*GE Amersham*; cat# RPN2106). Digital images were collected with a *Bio-Rad Laboratories* (Mississauga, Canada) ChemiDoc system and analyzed with *Bio-Rad Laboratories* Image Lab software.

### **RNA Isolation and Reverse Transcription**

Cerebral artery RNA was isolated with *Norgen Biotek* (Thorold, Canada) “Total RNA Purification Micro” spin columns (cat #35300), using the proteinase K digestion and DNA removal procedures, as directed by the manufacturer’s instructions. The RNA was converted to cDNA using a “Superscript III” reverse transcription kit (*ThermoFisher Scientific*; Mississauga, Canada; cat# 18080044), according to the manufacturer’s directions. Residual RNA was removed by incubating the resulting cDNA with RNase H (0.125 U/μl; *New England Biolabs*).

### **Quantitative PCR**

Quantitative PCR was performed using a *Bio-Rad Laboratories* CFX384 Real Time PCR Detection System. Each PCR reaction contained Power SYBR® Green PCR master mix (*ThermoFisher Scientific*) and rigorously validated primer sets (400 nmol/L in each reaction; **Supplemental Table I**). Gene targets and negative controls (water) were assessed in triplicate.

The PCR amplification consisted of 10 minutes denaturation at 95°C, followed by 40 cycles of amplification (15 s at 95°C + 60 s at 60°C). Following amplification, the amplicons were melted: the resulting dissociation curve confirmed the production of single product. Transcript expression levels in mouse tissues were calculated from the  $\Delta C_t$  values relative to the standard housekeeping gene glucose-6-phosphate dehydrogenase (G6PD). To confirm that G6PD was reliable for normalization, transcript expression levels were also calculated from the  $\Delta C_t$  values relative to hydroxymethylbilane synthase (HMBS) and glyceraldehyde 3-phosphate dehydrogenase (GAPDH).

### **Brain Fixation and Slide Preparation**

At 2 days post-SAH induction, animals were anesthetized with isoflurane; their brains were perfused with phosphate buffered saline (PBS; *Millipore Sigma* cat# 8537) and then perfusion fixed with 10% buffered formalin solution (*Millipore Sigma* cat# HT501128), both via the ascending aorta. Brains were immediately dissected and post-fixed in 10% formalin for 48 hours at 4°C. The brains were then cut into coronal sections 2 mm posterior to the bregma, embedded in paraffin and sectioned in 5μm thick coronal slices and mounted onto slides. The slides were subsequently deparaffinized with xylene and rehydrated and graded levels of in ethanol distilled water.

### **Immunohistochemistry**

Prior to blocking, slides were treated with citrate-based Antigen Unmasking Solution at 96°C for 30 minutes (*Vector Laboratories*; Burlingame, USA; cat# H-3300-250). The slides were subsequently permeabilized with 0.3% Triton X-100 in PBS for 1 hour at room temperature and then blocked with 10% goat serum (*Millipore Sigma* cat# G9023) in PBS containing 1% bovine serum albumin (BSA; *BioShop Canada Inc.* cat# ALB001) for 30 minutes at room temperature.

**Cleaved Caspase-3 / NeuN:** A subset of slides were double-stained for the apoptosis marker *cleaved caspase-3* and the neuronal marker *NeuN*. Slides were incubated with rabbit monoclonal anti-active cleaved caspase-3 overnight at 4°C (clone C92-605; 1:200 dilution in 1% BSA in PBS; *BD Biosciences Canada*; Mississauga Canada; cat# 559565) and subsequently conjugated with

Alexa Fluor 488-labeled goat anti-rabbit IgG for 1 hour at room temperature (1:500 dilution in 1% BSA in PBS; *ThermoFisher Scientific*; cat# A11008). The slides were then incubated with mouse monoclonal anti-NeuN antibody for 1 hour at room temperature (Clone A60; 1:200 dilution in 1% BSA in PBS; *Millipore Sigma* cat# MAB377) and subsequently conjugated with Alexa Fluor 568-labeled goat anti-mouse IgG for 1 hour at room temperature (1:500 dilution in 1% BSA in PBS; *ThermoFisher Scientific*; cat# A11004). Cell nuclei were then stained with DAPI (2 $\mu$ g/ml in PBS) for 15 minutes. After washing, the specimens were mounted with CC Mount (*Millipore Sigma*; cat# C9368).

**Iba-1:** A subset of slides were stained for the microglial-specific marker *ionized calcium binding adaptor molecule 1 (Iba1)*. Slides were incubated with rabbit anti-Iba-1 overnight at 4°C (1:750 dilution in 1% BSA in PBS; *FujiFilm Wako Chemicals USA Corp*; Richmond, USA; cat# 019-19741) and subsequently conjugated with Alexa Fluor 488-labeled goat anti-rabbit IgG for 1 hour at room temperature (1:500 dilution in 1% BSA in PBS; *ThermoFisher Scientific*; cat# A11008). Cell nuclei were then stained with DAPI (2 $\mu$ g/ml in PBS) for 15 minutes. After washing, the specimens were mounted with CC Mount.

### **Fluoro-Jade staining**

Brain slices were serially incubated with 1% NaOH / 80% ethanol (5 minutes), 70% ethanol (2 minutes), distilled water (2 minutes) and 0.06% potassium permanganate (10 minutes). After washing with deionized water, brain slices were stained with 0.0004% Fluoro-Jade C (*Millipore Sigma* ; cat# AG325) in 0.1% acetic acid (15 minutes). The samples were then washed with deionized water, dried and mounted.

### **Digital Imaging and assessments**

Digital immunofluorescence images at 20x or 40x magnification were acquired using a FV3000 laser confocal microscope under constant settings (Olympus Life Science, Richmond Hill, Canada).

For cleaved caspase-3 and Fluoro-Jade, 20x magnification image overlays were constructed with freely-available ImageJ 1.44p software (National Institutes of Health, USA): positively-stained neuronal cells were counted in the cortical region of the full coronal brain slice.

For Iba-1-stained microglial cells, 4 cortical images (20x magnification; 2 temporal and 2 parietal) and 2 hippocampal images were analyzed. The images were converted into a 16-bit binary image and a constant threshold was applied. Iba-1 staining was quantified as an “area fraction” (i.e., the percentage area of positive of Iba-1 staining relative to the field of view).

For microglial soma size measurements, images at 40x magnification were utilized. The images were converted into an 8-bit binary image to delineate a clear border between the microglia and the background fluorescence. All microglia within the field of view were counted and assigned a random number. A random number generator was used to select 8 microglia per field for soma quantification. The area of the soma was determined manually under blinded conditions using ImageJ software.

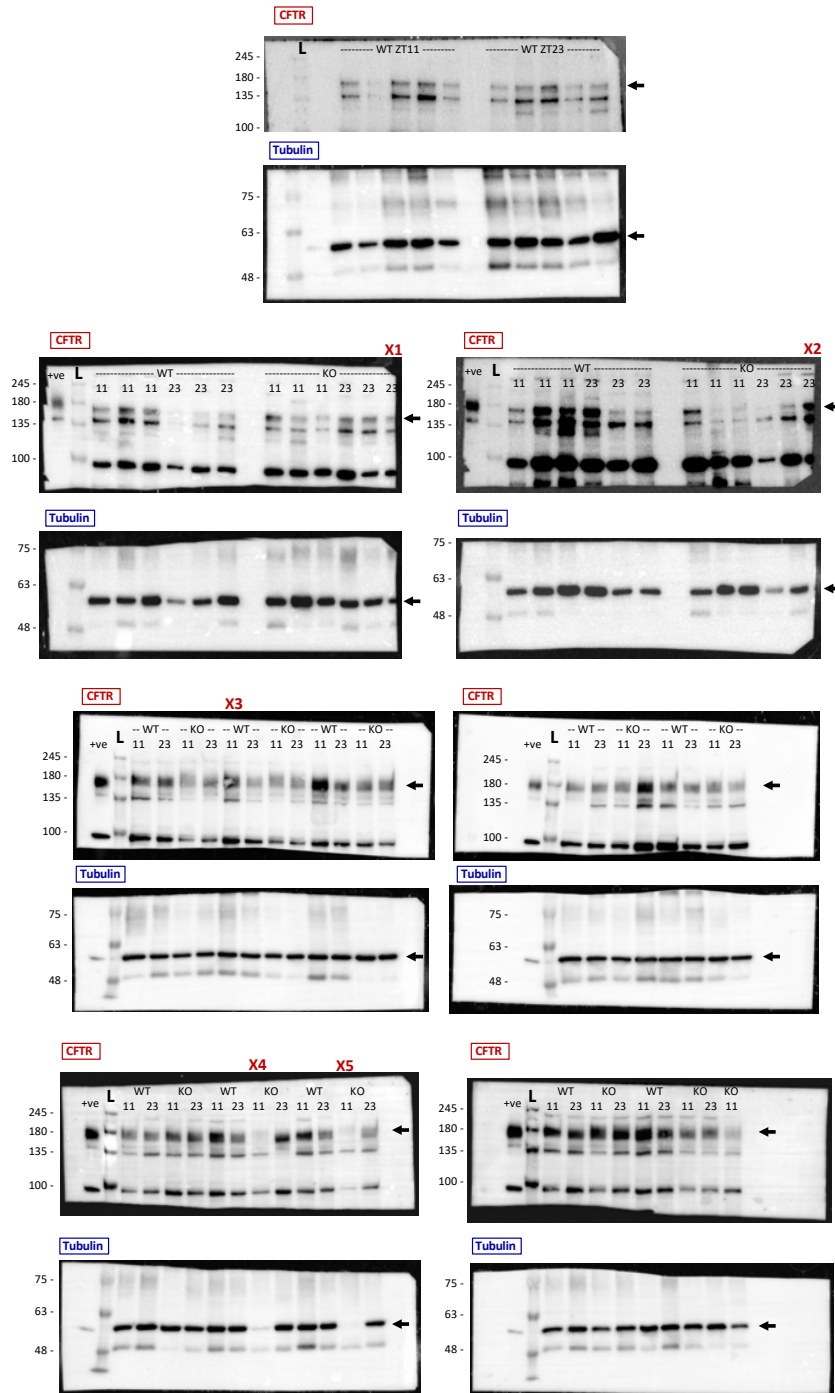

**Supplemental Figure I: Uncropped western blot images for CFTR / tubulin expression in cerebral arteries from Bmal1 knockout mice and wild-type controls.**

Shown are the uncropped, annotated western blots probing for cystic fibrosis transmembrane conductance regulator (CFTR) and tubulin expression in cerebral artery lysates prepared from tamoxifen-treated, Cre-expressing wild-type control mice (WT) and smooth muscle cell-specific Bmal1 knockout mice (KO) at Zeitgeber Time 11 (11) and Zeitgeber Time 23 (23). The ladder is designated as “L” and the positive control is designated as “+ve”. There were 5 exclusions made for technical reasons: X1/X2 were inadvertently cut by the edge of the membrane, X3 has a transfer defect and X4/X5 have low tubulin expression that made accurate quantification impossible. Data are summarized in Figure 5B.

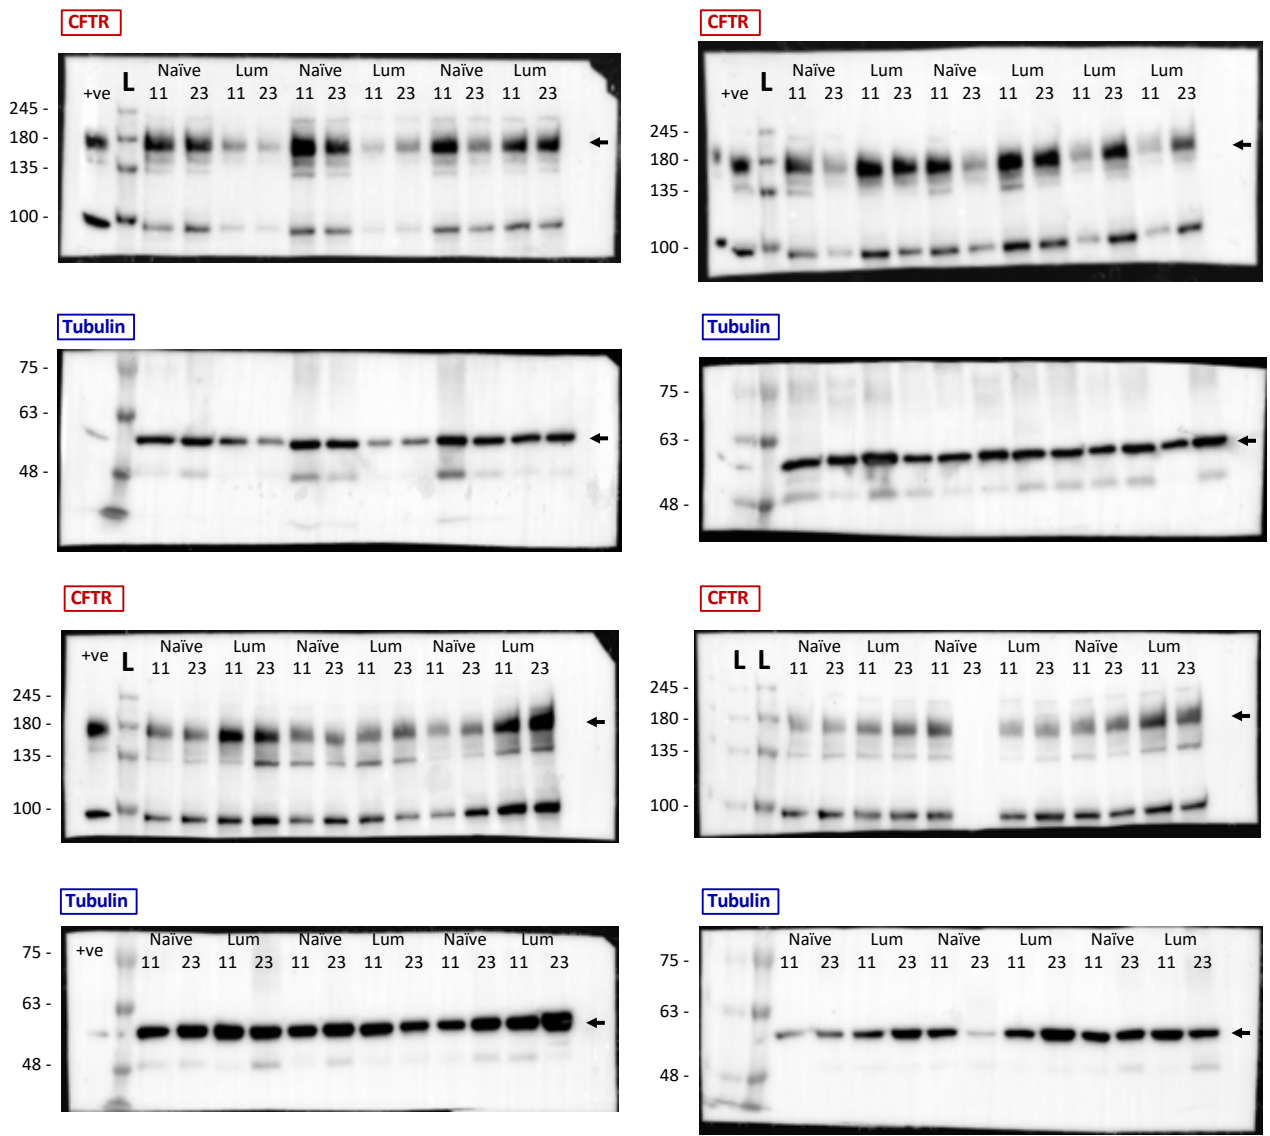

**Supplemental Figure II: Uncropped western blot images for CFTR / tubulin expression in cerebral arteries from lumacaftor-treated mice.**

Shown are the uncropped, annotated western blots probing for cystic fibrosis transmembrane conductance regulator (CFTR) and tubulin expression in cerebral artery lysates prepared from lumacaftor-treated (3mg/kg/day i.p. for 2 days; Lum) and vehicle-treated naïve mice at Zeitgeber Time 11 (11) and Zeitgeber Time 23 (23). The ladder is designated as “L” and the positive control is designated as “+ve”. Data are summarized in Figure 5E.

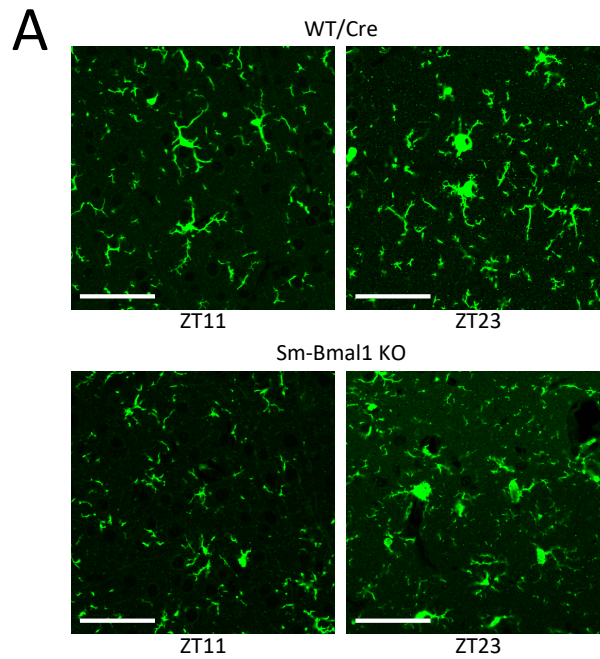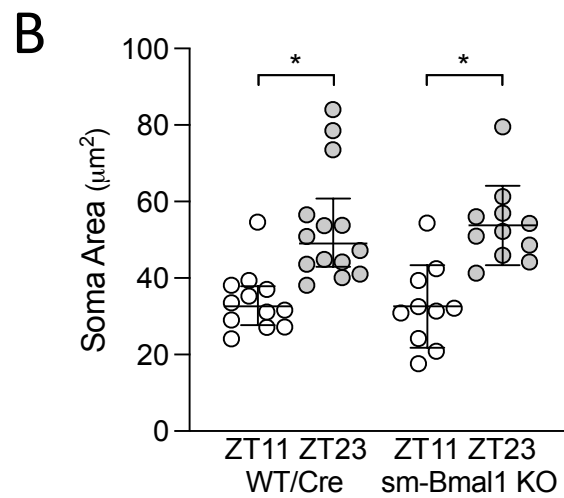

**Supplemental Figure III: Cortical microglial morphology following subarachnoid hemorrhage.**

(A) Representative high-magnification images of cortical cells stained with the microglia marker *ionized calcium-binding adaptor protein-1* (Iba-1). Brain tissue was isolated at 2 days post-subarachnoid hemorrhage (SAH) from Cre-expressing wild-type controls (WT/Cre; n=12-14) and smooth muscle cell-specific Bmal1 knockout mice (sm-Bmal1 KO; n=10-11). In both WT/Cre and sm-Bmal1 KO samples, microglial cells displayed a more activated morphology at ZT23, characterized by larger/elongated soma size, thicker processes and low ramification complexity. Bar = 40 µm.

(B) In both WT/Cre and sm-Bmal1 KO mice, microglial soma area is larger when SAH is induced at ZT23, relative to ZT11. WT/Cre data are presented as medians ± interquartile range. \* denotes P<0.05 for ZT11 versus ZT23.

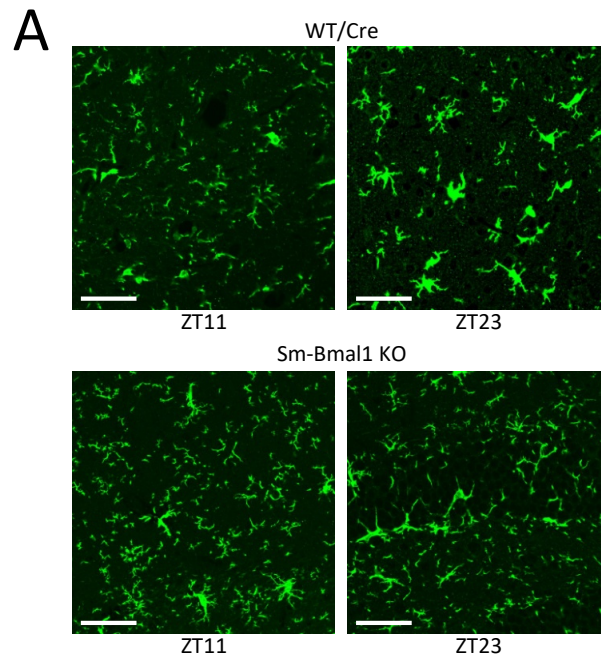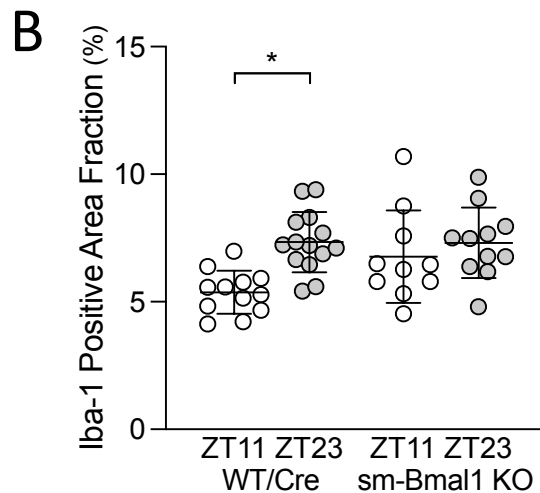

**Supplemental Figure IV: Hippocampal microglial cell activation in subarachnoid hemorrhage.**

(A) Representative images of *ionized calcium binding adaptor molecule 1* (*Iba-1*) staining in the hippocampal regions of coronal brain slices isolated at 2 days post-subarachnoid hemorrhage (SAH) from Cre-expressing wild-type controls (WT/Cre; n=13-14) and smooth muscle cell-specific *Bmal1* knockout mice (sm-Bmal1 KO; n=10-11). SAH was induced at either Zeitgeber time 11 (ZT11) or Zeitgeber time 23 (ZT23). Bar = 60  $\mu$ m. (B) Quantification of *Iba-1* staining, presented as the *positive area fraction* (i.e., the percent area of the image positively stained for *Iba-1*). In wild-type controls, hippocampal microglial cell activation is higher when SAH is induced at ZT23, relative to ZT11; this differential is lost in sm-Bmal1 KO mice. \* denotes  $P < 0.05$  for ZT11 versus ZT23.

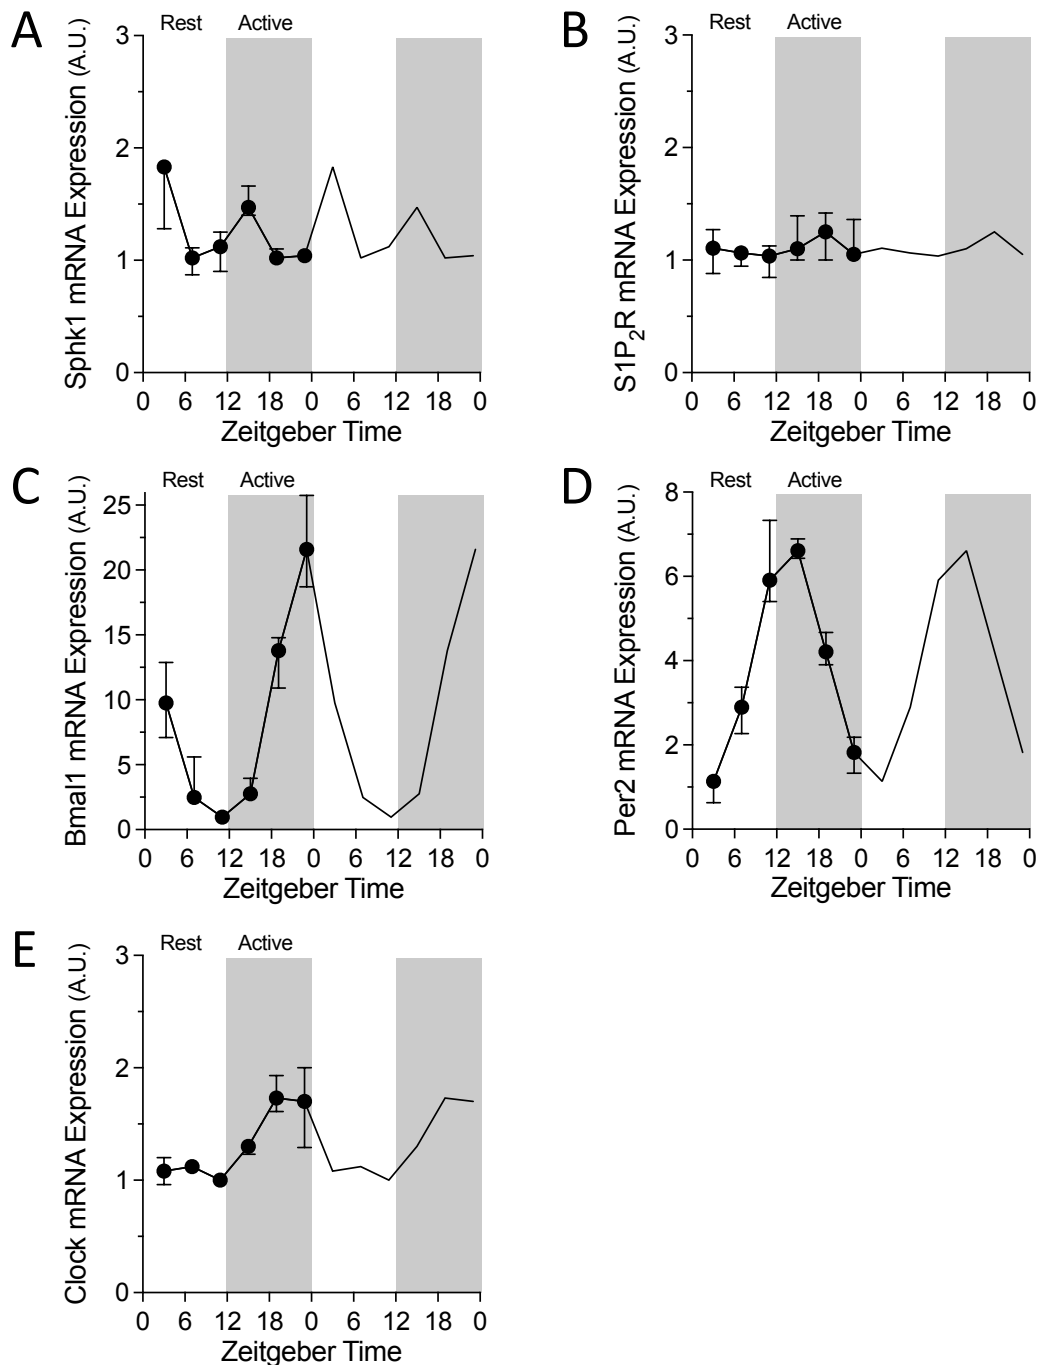

### Supplemental Figure V: mRNA expression in Zeitgeber time.

Cerebral artery (A) sphingosine kinase 1 (Sphk1), (B) sphingosine-1-phosphate receptor 2 (S1P<sub>2</sub>R), (C) brain and muscle aryl hydrocarbon receptor nuclear translocator-like protein 1 (Bmal1), (D) period circadian regulator 2 (Per2) and (E) circadian locomotor output cycles kaput (Clock) mRNA expression is plotted over Zeitgeber time. All data are presented as medians  $\pm$  interquartile range; the connecting lines are “double-plotted” to better illustrate the rhythms or lack thereof. White shading indicates “lights on”, dark shading indicates “lights off”. Sphk1 and S1P<sub>2</sub>R do not possess a circadian expression rhythm ( $P=N.S.$  by JTK cycle,  $n=2-4$ , see Supplemental Table VII). Bmal1, Per2 and Clock, all integral components of the core molecular clock, possess a statistically significant circadian expression rhythm ( $P<0.05$  by JTK cycle,  $n=3$ ; see Supplemental Table VII).



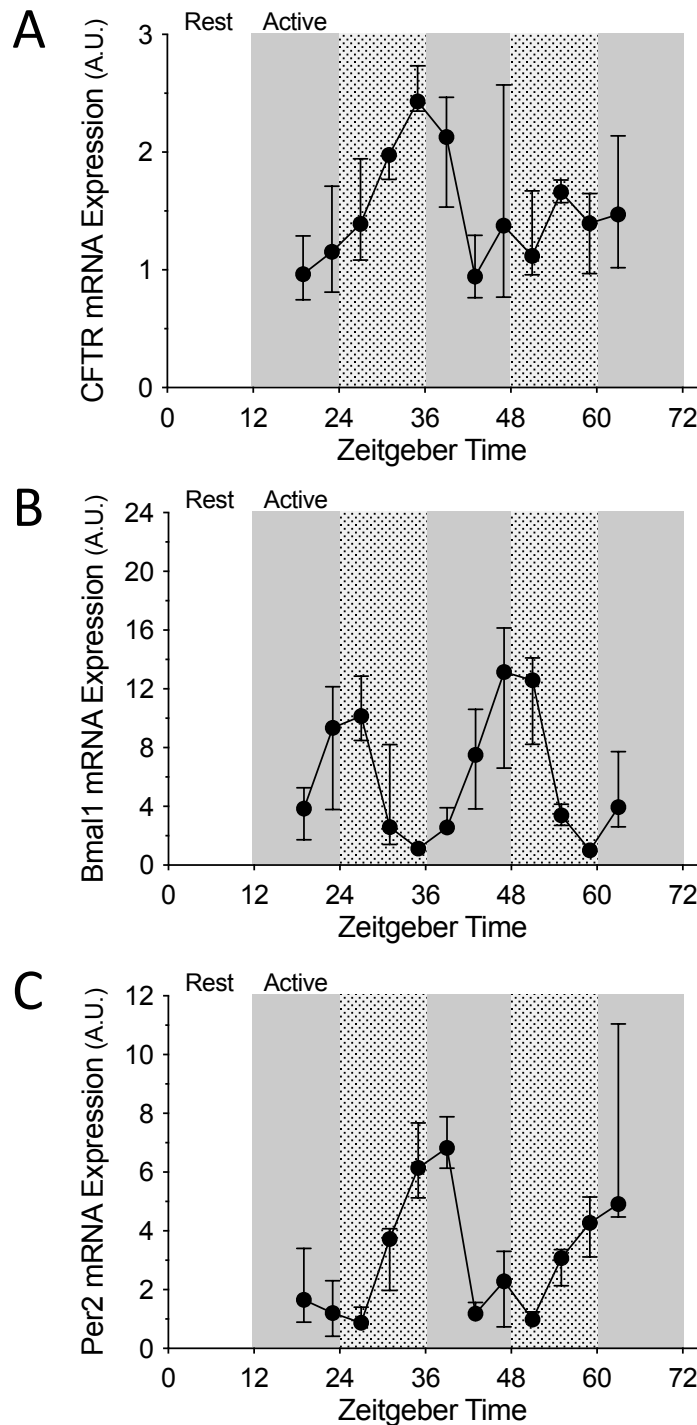

**Supplemental Figure VI: Circadian mRNA expression under constant dark conditions.**

Cerebral artery (A) cystic fibrosis transmembrane conductance regulator (CFTR), (B) brain and muscle aryl hydrocarbon receptor nuclear translocator-like protein 1 (Bmal1) and (C) period circadian regulator 2 (Per2) mRNA expression is plotted over Zeitgeber time. All data are presented as medians  $\pm$  interquartile range; white shading indicates “lights on”, dark shading indicates “lights off” and speckled shading indicates darkness when the lights would normally be on. All three transcripts possess a statistically significant circadian expression rhythm that persists under constant dark conditions ( $P < 0.05$  by JTK cycle,  $n = 4$ , see Supplemental Table VI1).

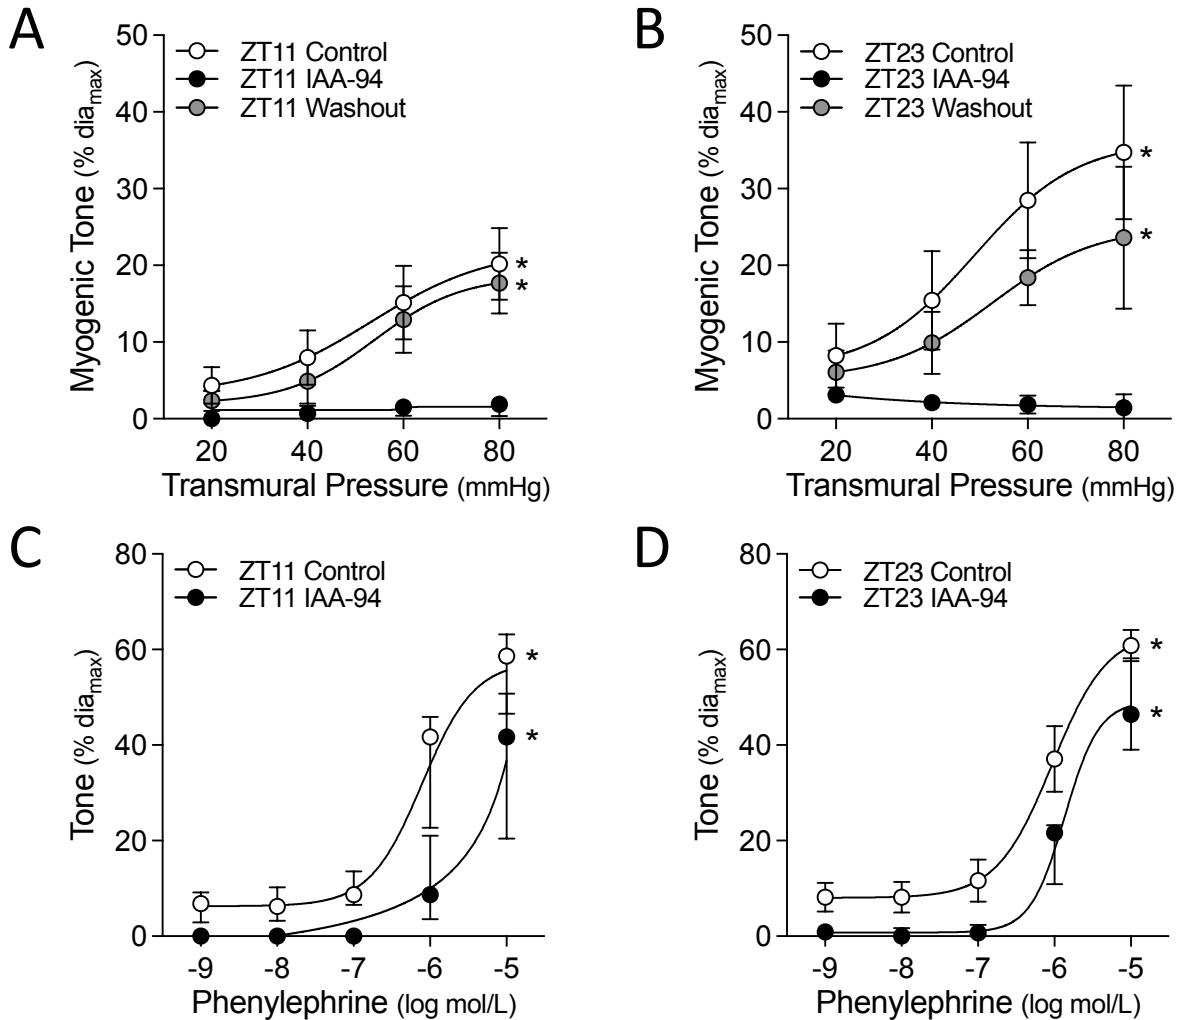

### Supplemental Figure VII: Chloride channel blockade abolishes cerebral artery myogenic tone.

In *Panels A and B*, myogenic vasoconstriction was assessed in olfactory cerebral arteries under control conditions, following chloride channel inhibitor treatment (100  $\mu\text{mol/L}$  indanyloxyacetic acid 94 [IAA-94] for 30 minutes *in vitro*) and following washout (30 minutes in buffer). IAA-94 reversibly abolishes myogenic vasoconstriction at both **(A)** ZT11 ( $n=5$  paired comparisons) and **(B)** ZT23 ( $n=5$  paired comparisons). Specifically, elevating pressure increases myogenic tone in the control and washout conditions, but not in the IAA-94-treated condition. In *Panels C and D*, phenylephrine-stimulated vasoconstriction was assessed in olfactory cerebral arteries under control conditions and following IAA-94 treatment (100  $\mu\text{mol/L}$  for 30 minutes *in vitro*). Unlike myogenic tone, IAA-94 treatment does not abolish phenylephrine-stimulated vasoconstriction at either **(C)** ZT11 ( $n=5$  paired comparisons) and **(D)** ZT23 ( $n=5$  paired comparisons). \* denotes  $P < 0.05$  for an effect of pressure / phenylephrine by either a repeated measures ANOVA or Freidman's test.

In *Panels A and B*, the control and wash curves are analyzed with a repeated measures ANOVA. In *Panel A*, the IAA-94 curve is presented as medians  $\pm$  interquartile range and analyzed with a Freidman's test; in *Panel B*, the IAA-94 curve is analyzed with a repeated measures ANOVA. In *Panel C*, all data are presented as medians  $\pm$  interquartile range and analyzed with a Freidman's test. In *Panel D*, the control curve is analyzed with a repeated measures ANOVA; the IAA-94 curve is presented as medians  $\pm$  interquartile range and analyzed with a Freidman's test.

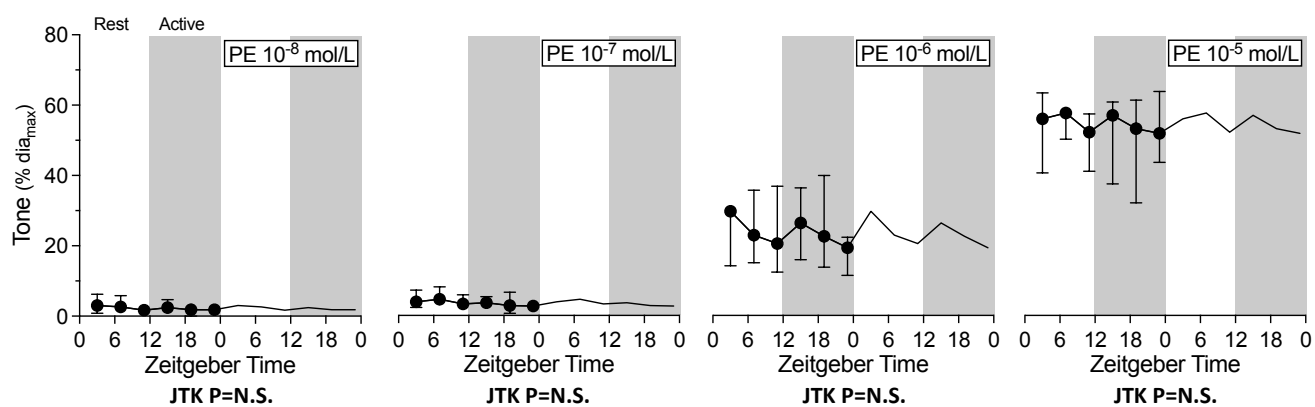

### Supplemental Figure VIII: Cerebral artery phenylephrine responses in lumacaftor-treated mice.

Phenylephrine-stimulated vasoconstriction in olfactory cerebral arteries isolated from lumacaftor-treated wild-type mice plotted over Zeitgeber time (n=5-6). All data are presented as medians  $\pm$  interquartile range; the connecting lines are “double-plotted” to better illustrate lack of rhythmicity (P=N.S. for a circadian rhythm by JTK cycle, see Supplemental Table VII). White shading indicates “lights on”, dark shading indicates “lights off”.

**Supplemental Table I: Quantitative PCR primer information.**

| <b>Gene</b>             | <b>Primer Sequences (5' to 3')</b>                | <b>Size (bp)</b> | <b>Efficiency</b> | <b>Accession no.</b> |
|-------------------------|---------------------------------------------------|------------------|-------------------|----------------------|
| <b>Bmal1</b>            | GCCACCAACCCATACACAGA<br>TCTTCCCTCGGTACATCCT       | 124              | 1.09              | NM_007489.4          |
| <b>Per2</b>             | CACACTGCTGCCCTGAGTTC<br>ATCTGAGGACCAGCAGCACA      | 120              | 0.98              | NM_011066.3          |
| <b>Clock</b>            | TGCAGGTACCTTGCTCTGGA<br>GGTTTAACGCCAGCCTCAAG      | 108              | 1.00              | NM_007715.6          |
| <b>CFTR</b>             | CTGGACCACACCAATTTTGAGG<br>GCGTGGATAAGCTGGGGAT     | 162              | 1.05              | NM_021050.2          |
| <b>Sphk1</b>            | TGGGGCTATGACTTGAAAG<br>CCAGGGAAGGTCCTAAGAG        | 125              | 0.97              | NM_011451.3          |
| <b>S1P<sub>2</sub>R</b> | ATGGGCGGCTTATACTCAGAG<br>GCCGAGCACAAGATGATGAT     | 137              | 1.02              | NM_010333.4          |
| <b>GAPDH</b>            | AGGTCGGTGTGAACGGATTTG<br>TG TAGACCATGTAGTTGAGGTCA | 123              | 0.94              | NM_008084.2          |
| <b>G6PD</b>             | CACAGTGGACGACATCCGAAA<br>AGCTACATAGGAATTACGGGCAA  | 103              | 1.02              | NM_008062            |
| <b>HMBS</b>             | CCCGTAACATTCCAAGAGGA<br>CCTGTGCCCTACAGACCAGT      | 147              | 1.08              | NM_013551.2          |

Abbreviations: Bmal1 = brain and muscle aryl hydrocarbon receptor nuclear translocator-like protein 1, Per2 = period circadian regulator 2, Clock = circadian locomotor output cycles kaput, CFTR = cystic fibrosis transmembrane conductance regulator, Sphk1 = sphingosine kinase 1, S1P<sub>2</sub>R = sphingosine-1-phosphate receptor 2, GAPDH = glyceraldehyde 3-phosphate dehydrogenase, G6PD = glucose-6-phosphate dehydrogenase, HMBS = hydroxymethylbilane synthase. The column heading “size” refers to the amplicon product size in base pairs (bp).

## Supplemental Table II: Cohort information.

| Genotype    | Sex | Intervention                       | Zeitgeber Time                 | Experimental Endpoints            | Weight (g) | n  | SAH Mortality |
|-------------|-----|------------------------------------|--------------------------------|-----------------------------------|------------|----|---------------|
| Wild-Type   | M   | --                                 | ZT3/ZT7/ZT11/ZT15/ZT19/ZT23    | Myography                         | 20-25      | 29 | --            |
| Wild-Type   | M   | Lumacaftor (in vivo)               | ZT3/ZT7/ZT11/ZT15/ZT19/ZT23    | Myography                         | 23-26      | 18 | --            |
| Wild-Type   | M   | CFTR(inh)-172 (in vitro)           | ZT11/ZT23                      | Myography                         | 20-25      | 9  | --            |
| Wild-Type   | M   | IAA-94 (in vitro)                  | ZT11/ZT23                      | Myography                         | 20-25      | 7  | --            |
| Wild-Type   | M   | --                                 | ZT3/ZT7/ZT11/ZT15/ZT19/ZT23    | mRNA / qPCR                       | 20-25      | 24 | --            |
| Wild-Type   | M   | --                                 | Constant Dark (12 time points) | mRNA / qPCR                       | 20-25      | 48 | --            |
| Wild-Type   | M   | Lumacaftor/Vehicle (in vivo)       | ZT11/ZT23                      | Western Blot                      | 21-26      | 45 | --            |
| Wild-Type   | M   | SAH Surgery / Lumacaftor (in vivo) | ZT11                           | Histology, Modified Garcia Scores | 21-26      | 14 | 0             |
| Wild-Type   | M   | SAH Surgery / Lumacaftor (in vivo) | ZT23                           | Histology, Modified Garcia Scores | 21-26      | 12 | 0             |
| Wild-Type   | M   | --                                 | ZT11/ZT23                      | Blood Donor for SAH               | 21-26      | 26 | --            |
| WT/Cre      | M   | SAH Surgery                        | ZT11                           | Histology, Modified Garcia Scores | 25-30      | 14 | 1             |
| WT/Cre      | M   | SAH Surgery                        | ZT23                           | Histology, Modified Garcia Scores | 25-30      | 14 | 0             |
| WT/Cre      | M   | --                                 | ZT11/ZT23                      | Blood Donor for SAH               | 25-30      | 28 | --            |
| WT/Cre      | M   | --                                 | ZT11/ZT23                      | Myography                         | 20-25      | 9  | --            |
| WT/Cre      | M   | --                                 | ZT11/ZT23                      | Western Blots                     | 20-25      | 41 | --            |
| sm-Bmal1 KO | M   | SAH Surgery                        | ZT11                           | Histology, Modified Garcia Scores | 25-30      | 11 | 1             |
| sm-Bmal1 KO | M   | SAH Surgery                        | ZT23                           | Histology, Modified Garcia Scores | 25-30      | 11 | 0             |
| sm-Bmal1 KO | M   | --                                 | ZT11/ZT23                      | Blood Donor for SAH               | 25-30      | 22 | --            |
| sm-Bmal1 KO | M   | --                                 | ZT3/ZT7/ZT11/ZT15/ZT19/ZT23    | Myography                         | 20-25      | 21 | --            |
| sm-Bmal1 KO | M   | --                                 | ZT11/ZT23                      | Western Blots                     | 20-25      | 26 | --            |

Experimetal Mice: 353

Blood Donor Mice: 76

Total Mice: 429

Column “n” refers to the number of mice utilized for the experimental series and column “SAH Mortality” refers to the number of mice that died as a result of the SAH surgical procedure. This study used male mice only.

*Abbreviations:* M = male; SAH = subarachnoid hemorrhage; sm-Bmal1 KO = smooth muscle specific Bmal1 1 knockout; WT/Cre = tamoxifen treated, Cre-expressing wild-type control; ZT = Zeitgeber time.

**Supplemental Table III: Experimental timeline information.**

| Year | Experimental Endpoints   | Data Set                                 | Sets      | Concurrent | Figures    |
|------|--------------------------|------------------------------------------|-----------|------------|------------|
| 1    | Myography                | WT Circadian Rhythm Assessment           | --        | No         | 1A,B       |
| 1    | mRNA / qPCR              | RNA Circadian Rhythm Assessment          | --        | No         | 5A, Sup 3  |
| 1    | mRNA / qPCR              | Constant Dark Rhythm Assessment          | --        | No         | Sup 2      |
| 2    | Myography                | CFTR(inh)-172                            | --        | No         | 5 C,D      |
| 2    | Western blot             | CFTR expression (WT/Cre only)            | 1 (n=5)   | No         | 5B         |
| 3    | Myography                | sm-Bmal1 KO Rhythm Assessment            | --        | No         | 1C,D       |
| 3    | Myography                | WT/Cre ZT11/ZT23                         | --        | Yes        | 2B         |
| 3    | SAH Garcia and Histology | WT/Cre and sm-Bmal1 KO                   | --        | Yes        | 2-4, Sup 1 |
| 3    | Western blot             | CFTR expression (WT/Cre and sm-Bmal1 KO) | 3 (n=4-5) | No         | 5C         |
| 3    | Western blot             | CFTR expression (WT + Lum)               | 2 (n=5-7) | Yes        | 5E         |
| 3    | Myography                | WT + Lum Circadian Rhythm Assessment     | --        | Yes        | 5F, Sup 5  |
| 3    | SAH Garcia and Histology | WT + Lum                                 | --        | Yes        | 6          |
| 3    | Myography                | IAA-94                                   | --        | No         | Sup 4      |

Western blot data was collected in multiple, independent experiments that were merged. The column “Sets” refers to the number of independent experiments, with group sizes listed in parentheses.

*Abbreviations:* SAH = subarachnoid hemorrhage; sm-Bmal1 KO = smooth muscle specific Bmal1 knockout; WT/Cre = tamoxifen treated, Cre-expressing wild-type control; WT + Lum = wild type mice treated with 3mg/kg/day lumacaftor for 2 days prior to experimental assessment; ZT = Zeitgeber time.



## Supplemental Table V: Article Figure Data and Statistics– ZT11 / ZT23 Comparisons.

| Figure      | Genotype           | Parameter        | Level      | ZT11      | n  | N  | ZT23      | n  | N  | Comparison Test                                         | Statistics                                                                                                                                                                                                                                                                                                                                                                                                                                                                                                                                                       |
|-------------|--------------------|------------------|------------|-----------|----|----|-----------|----|----|---------------------------------------------------------|------------------------------------------------------------------------------------------------------------------------------------------------------------------------------------------------------------------------------------------------------------------------------------------------------------------------------------------------------------------------------------------------------------------------------------------------------------------------------------------------------------------------------------------------------------------|
| 2B          | WT/Cre             | Myogenic         | 20 mmHg    | 1.7±1.3   | 5  | 4  | 2.7±2.8   | 6  | 5  | Repeated 2-Way ANOVA with Geisser-Greenhouse correction | Transmural Pressure (Repeated Measures): F(1.33, 13.35) = 39.40, <b>p &lt; 0.001</b> ; Zeitgeber Time (Non-Repeated Measures): F(1, 9) = 7.78, <b>p = 0.02</b> ; W <sub>ZT11,20(5)</sub> = 0.95, p = 0.75; W <sub>ZT23,20(6)</sub> = 0.90, p = 0.37; W <sub>ZT11,40(5)</sub> = 0.97, p = 0.88; W <sub>ZT23,40(6)</sub> = 0.90, p = 0.38; W <sub>ZT11,60(5)</sub> = 0.84, p = 0.17; W <sub>ZT23,60(6)</sub> = 0.91, p = 0.43; W <sub>ZT11,80(5)</sub> = 0.82, p = 0.13; W <sub>ZT23,80(6)</sub> = 0.92, p = 0.48; Brown-Forsythe F(7,36) = 3.46, <b>p = 0.006</b> |
| 2B          | WT/Cre             | Myogenic         | 40 mmHg    | 3.9±1.6   | 5  | 4  | 8.9±4.8   | 6  | 5  |                                                         |                                                                                                                                                                                                                                                                                                                                                                                                                                                                                                                                                                  |
| 2B          | WT/Cre             | Myogenic         | 60 mmHg    | 9.0±1.8   | 5  | 4  | 17.2±7.7  | 6  | 5  |                                                         |                                                                                                                                                                                                                                                                                                                                                                                                                                                                                                                                                                  |
| 2B          | WT/Cre             | Myogenic         | 80 mmHg    | 13.3±1.2  | 5  | 4  | 24.2±8.1  | 6  | 5  |                                                         |                                                                                                                                                                                                                                                                                                                                                                                                                                                                                                                                                                  |
| 2C          | WT/Cre             | Fluoro-Jade      | --         | 80±45     | 13 | 13 | 162±69    | 14 | 14 | t test                                                  | t(25) = 3.65, <b>p = 0.001</b> ; F(13,12) = 2.28, p = 0.16; W <sub>ZT11(13)</sub> = 0.95, p = 0.66; W <sub>ZT23(14)</sub> = 0.97, p = 0.90                                                                                                                                                                                                                                                                                                                                                                                                                       |
| 2C          | WT/Cre             | Caspase-3        | --         | 160±112   | 13 | 13 | 303±175   | 14 | 14 | t test                                                  | t(25) = 2.51, <b>p = 0.02</b> ; F(13,12) = 2.43, p = 0.13; W <sub>ZT11(13)</sub> = 0.89, p = 0.09; W <sub>ZT23(14)</sub> = 0.91, p = 0.17                                                                                                                                                                                                                                                                                                                                                                                                                        |
| 2D          | WT/Cre             | Garcia Score     | --         | 16.0±1.4  | 12 | 12 | 14.3±1.4  | 14 | 14 | Mann-Whitney                                            | U(N <sub>ZT11</sub> = 10, N <sub>ZT23</sub> = 14) = 44, z = -2.03, <b>p = 0.04</b>                                                                                                                                                                                                                                                                                                                                                                                                                                                                               |
| 3B          | sm-Bmal1 KO        | Myogenic         | 20 mmHg    | 5.2±3.0   | 6  | 3  | 2.4±1.1   | 6  | 3  | Repeated 2-Way ANOVA with Geisser-Greenhouse correction | Transmural Pressure (Repeated Measures): F(1.20, 13.24) = 78.10, <b>p &lt; 0.001</b> ; Zeitgeber Time (Non-Repeated Measures): F(1, 10) = 10.83, <b>p = 0.008</b> ; W <sub>ZT11,20(6)</sub> = 0.82, p = 0.08; W <sub>ZT23,20(6)</sub> = 0.95, p = 0.71; W <sub>ZT11,40(6)</sub> = 0.93, p = 0.60; W <sub>ZT23,40(6)</sub> = 0.94, p = 0.66; W <sub>ZT11,60(6)</sub> = 0.82, p = 0.09; W <sub>ZT23,60(6)</sub> = 0.85, p = 0.17; W <sub>ZT11,80(6)</sub> = 0.85, p = 0.16; W <sub>ZT23,80(6)</sub> = 0.81, p = 0.07; Brown-Forsythe F(7,40) = 1.21, p = 0.322     |
| 3B          | sm-Bmal1 KO        | Myogenic         | 40 mmHg    | 12.4±4.1  | 6  | 3  | 5.6±2.3   | 6  | 3  |                                                         |                                                                                                                                                                                                                                                                                                                                                                                                                                                                                                                                                                  |
| 3B          | sm-Bmal1 KO        | Myogenic         | 60 mmHg    | 18.5±5.7  | 6  | 3  | 9.7±3.2   | 6  | 3  |                                                         |                                                                                                                                                                                                                                                                                                                                                                                                                                                                                                                                                                  |
| 3B          | sm-Bmal1 KO        | Myogenic         | 80 mmHg    | 23.4±6.6  | 6  | 3  | 13.4±3.9  | 6  | 3  |                                                         |                                                                                                                                                                                                                                                                                                                                                                                                                                                                                                                                                                  |
| 3C          | sm-Bmal1 KO        | Fluoro-Jade      | --         | 133±143   | 10 | 10 | 37±26     | 11 | 11 | Mann-Whitney                                            | U(N <sub>ZT11</sub> = 10, N <sub>ZT23</sub> = 11) = 9, z = -3.20, <b>p &lt; 0.001</b> ; F(9,10) = 4.90, <b>p = 0.02</b> ; W <sub>ZT11(10)</sub> = 0.93, p = 0.41; W <sub>ZT23(11)</sub> = 0.83, <b>p = 0.02</b>                                                                                                                                                                                                                                                                                                                                                  |
| 3C          | sm-Bmal1 KO        | Caspase-3        | --         | 302±173   | 10 | 10 | 158±77    | 11 | 11 | Welch's t test                                          | t(12,18) = 2.42, <b>p = 0.03</b> ; F(9,10) = 5.05, <b>p = 0.02</b> ; W <sub>ZT11(10)</sub> = 0.89, p = 0.17; W <sub>ZT23(11)</sub> = 0.95, p = 0.60                                                                                                                                                                                                                                                                                                                                                                                                              |
| 3D          | sm-Bmal1 KO        | Garcia Score     | --         | 15.5±2.3  | 10 | 10 | 16.5±2.0  | 11 | 11 | Mann-Whitney                                            | U(N <sub>ZT11</sub> = 10, N <sub>ZT23</sub> = 11) = 17, z = 2.64, <b>p = 0.008</b>                                                                                                                                                                                                                                                                                                                                                                                                                                                                               |
| 4B          | WT/Cre             | Microglial %     | --         | 4.8±0.8   | 13 | 13 | 6.1±0.6   | 13 | 13 | t test                                                  | t(24) = 4.72, <b>p &lt; 0.001</b> ; F(12,12) = 1.69, p = 0.38; W <sub>ZT11(13)</sub> = 0.96, p = 0.77; W <sub>ZT23(13)</sub> = 0.95, p = 0.54                                                                                                                                                                                                                                                                                                                                                                                                                    |
| 4B          | sm-Bmal1 KO        | Microglial %     | --         | 5.4±1.2   | 10 | 10 | 6.5±1.0   | 11 | 11 | t test                                                  | t(19) = 2.30, <b>p &lt; 0.03</b> ; F(9,10) = 1.40, p = 0.61; W <sub>ZT11(10)</sub> = 0.93, p = 0.41; W <sub>ZT23(11)</sub> = 0.95, p = 0.61                                                                                                                                                                                                                                                                                                                                                                                                                      |
| 4D          | WT/Cre             | ACA Constriction | --         | 4.1±1.4   | 12 | 12 | 4.4±1.2   | 13 | 13 | t test                                                  | t(23) = 0.56, p = 0.58; F(11,12) = 1.33, p = 0.62; W <sub>ZT11(12)</sub> = 0.91, p = 0.21; W <sub>ZT23(13)</sub> = 0.92, p = 0.26                                                                                                                                                                                                                                                                                                                                                                                                                                |
| 5B          | WT/Cre             | CFTR protein     | --         | 1.0±0.5   | 20 | 20 | 6.0±0.4   | 21 | 21 | Kruskal-Wallis with Dunn's post-test                    | H(3) = 14.34, <b>p = 0.003</b> ; WT11 vs. WT23 <b>p = 0.03</b> ; KO11 vs. KO23 <b>p &gt; 0.999</b> ; WT11 vs. KO11 <b>p = 0.002</b> ; WT23 vs. KO23 <b>p &gt; 0.999</b> ; W <sub>WT11(20)</sub> = 0.95, p = 0.43; W <sub>WT23(21)</sub> = 0.93, p = 0.12; W <sub>KO11(14)</sub> = 0.88, p = 0.06; W <sub>KO23(12)</sub> = 0.81, <b>p = 0.01</b> ; Brown-Forsythe F(3,63) = 0.54, p = 0.658                                                                                                                                                                       |
| 5B          | sm-Bmal1 KO        | CFTR protein     | --         | 0.6±0.3   | 14 | 14 | 6.0±0.3   | 12 | 12 |                                                         |                                                                                                                                                                                                                                                                                                                                                                                                                                                                                                                                                                  |
| 5B          | --                 | --               | --         | --        | -- | -- | --        | -- | -- |                                                         |                                                                                                                                                                                                                                                                                                                                                                                                                                                                                                                                                                  |
| 5E          | WT+Vehicle         | CFTR protein     | --         | 1.0±0.2   | 11 | 11 | 6.0±0.2   | 10 | 10 | ANOVA with Bonferroni corrected post-test               | ANOVA F(3,41) = 4.16, <b>p = 0.01</b> ; Con11 vs. Con23 <b>p = 0.01</b> ; Lum11 vs. Lum23 <b>p = 0.95</b> ; Con11 vs. Lum11 <b>p = 0.72</b> ; Con23 vs. Lum23 <b>p = 0.02</b> ; Brown-Forsythe F(3,41) = 1.34, p = 0.27                                                                                                                                                                                                                                                                                                                                          |
| 5E          | WT+Lum             | CFTR protein     | --         | 0.8±0.3   | 12 | 12 | 1.0±0.3   | 12 | 12 |                                                         |                                                                                                                                                                                                                                                                                                                                                                                                                                                                                                                                                                  |
| 5E          | --                 | --               | --         | --        | -- | -- | --        | -- | -- |                                                         |                                                                                                                                                                                                                                                                                                                                                                                                                                                                                                                                                                  |
| 5E          | --                 | --               | --         | --        | -- | -- | --        | -- | -- |                                                         |                                                                                                                                                                                                                                                                                                                                                                                                                                                                                                                                                                  |
| 6B          | WT+Lum             | Myogenic         | 20 mmHg    | 5.2±3.0   | 6  | 3  | 2.4±1.1   | 6  | 3  | Repeated 2-Way ANOVA with Geisser-Greenhouse correction | Transmural Pressure (Repeated Measures): F(1.25, 12.20) = 20.54, <b>p &lt; 0.001</b> ; Zeitgeber Time (Non-Repeated Measures): F(1, 8) = 0.51, p = 0.494; W <sub>ZT11,20(5)</sub> = 0.89, p = 0.36; W <sub>ZT23,20(5)</sub> = 0.78, p = 0.05; W <sub>ZT11,40(5)</sub> = 0.92, p = 0.51; W <sub>ZT23,40(5)</sub> = 0.83, p = 0.13; W <sub>ZT11,60(5)</sub> = 0.86, p = 0.23; W <sub>ZT23,60(5)</sub> = 0.85, p = 0.18; W <sub>ZT11,80(5)</sub> = 0.81, p = 0.10; W <sub>ZT23,80(5)</sub> = 0.89, p = 0.34; Brown-Forsythe F(7,32) = 0.69, p = 0.682               |
| 6B          | WT+Lum             | Myogenic         | 40 mmHg    | 12.4±4.1  | 6  | 3  | 5.6±2.3   | 6  | 3  |                                                         |                                                                                                                                                                                                                                                                                                                                                                                                                                                                                                                                                                  |
| 6B          | WT+Lum             | Myogenic         | 60 mmHg    | 18.5±5.7  | 6  | 3  | 9.7±3.2   | 6  | 3  |                                                         |                                                                                                                                                                                                                                                                                                                                                                                                                                                                                                                                                                  |
| 6B          | WT+Lum             | Myogenic         | 80 mmHg    | 23.4±6.6  | 6  | 3  | 13.4±3.9  | 6  | 3  |                                                         |                                                                                                                                                                                                                                                                                                                                                                                                                                                                                                                                                                  |
| 6C          | WT+Lum             | Fluoro-Jade      | --         | 234±158   | 14 | 14 | 136±73    | 12 | 12 | Welch's t test                                          | t(18,83) = 2.09, p = 0.05; F(13,11) = 4.75, <b>p = 0.01</b> ; W <sub>ZT11(14)</sub> = 0.93, p = 0.33; W <sub>ZT23(12)</sub> = 0.90, p = 0.15                                                                                                                                                                                                                                                                                                                                                                                                                     |
| 6C          | WT+Lum             | Caspase-3        | --         | 197±119   | 14 | 14 | 143±71    | 12 | 12 | t test                                                  | t(24) = 1.38, p = 0.18; F(13,11) = 2.84, p = 0.09; W <sub>ZT11(14)</sub> = 0.89, p = 0.09; W <sub>ZT23(12)</sub> = 0.93, p = 0.41                                                                                                                                                                                                                                                                                                                                                                                                                                |
| 6D          | WT+Lum             | Garcia Score     | --         | 14.0±5.5  | 14 | 14 | 16.0±2.0  | 12 | 12 | Mann-Whitney                                            | U(N <sub>ZT11</sub> = 14, N <sub>ZT23</sub> = 12) = 49, z = -1.77, <b>p = 0.07</b>                                                                                                                                                                                                                                                                                                                                                                                                                                                                               |
| Sup III-B   | WT/Cre             | Soma Size        | --         | 32.6±10.2 | 12 | 12 | 49.1±17.8 | 14 | 14 | Mann-Whitney                                            | U(N <sub>ZT11</sub> = 12, N <sub>ZT23</sub> = 14) = 12, z = -3.68, <b>p &lt; 0.001</b> ; F(13,11) = 3.39, p = 0.05; W <sub>ZT11(12)</sub> = 0.88, p = 0.09; W <sub>ZT23(14)</sub> = 0.84, <b>p = 0.02</b>                                                                                                                                                                                                                                                                                                                                                        |
| Sup III-B   | sm-Bmal1 KO        | Soma Size        | --         | 32.6±10.8 | 10 | 10 | 53.8±10.4 | 11 | 11 | t test                                                  | t(19) = 4.57, <b>p &lt; 0.001</b> ; F(9,10) = 1.08, p = 0.90; W <sub>ZT11(10)</sub> = 0.95, p = 0.67; W <sub>ZT23(11)</sub> = 0.88, p = 0.11                                                                                                                                                                                                                                                                                                                                                                                                                     |
| Sup IV-B    | WT/Cre             | Microglial %     | --         | 5.4±0.8   | 12 | 12 | 7.3±1.2   | 14 | 14 | t test                                                  | t(24) = 4.81, <b>p &lt; 0.001</b> ; F(13,11) = 1.95, p = 0.27; W <sub>ZT11(12)</sub> = 0.98, p = 0.97; W <sub>ZT23(14)</sub> = 0.96, p = 0.67                                                                                                                                                                                                                                                                                                                                                                                                                    |
| Sup IV-B    | sm-Bmal1 KO        | Microglial %     | --         | 6.8±1.8   | 10 | 10 | 7.3±1.4   | 11 | 11 | t test                                                  | t(19) = 0.78, p = 0.45; F(9,10) = 1.71, p = 0.41; W <sub>ZT11(10)</sub> = 0.90, p = 0.21; W <sub>ZT23(11)</sub> = 0.97, p = 0.92                                                                                                                                                                                                                                                                                                                                                                                                                                 |
| Sup VII-A,B | Control            | Myogenic         | 20 mmHg    | 4.3±2.4   | 5  | 3  | 8.2±4.2   | 5  | 3  | (ZT11) Repeated Measures ANOVA                          | ZT11 ANOVA F(3,12) = 45.24, <b>p &lt; 0.001</b> ; W <sub>ZT11,20(5)</sub> = 0.91, p = 0.44; W <sub>ZT11,40(5)</sub> = 0.94, p = 0.67; W <sub>ZT11,60(5)</sub> = 0.98, p = 0.95; W <sub>ZT11,80(5)</sub> = 0.81, p = 0.10; Brown-Forsythe F(3,16) = 0.34, p = 0.794                                                                                                                                                                                                                                                                                               |
| Sup VII-A,B | Control            | Myogenic         | 40 mmHg    | 8.0±3.5   | 5  | 3  | 15.4±6.4  | 5  | 3  |                                                         |                                                                                                                                                                                                                                                                                                                                                                                                                                                                                                                                                                  |
| Sup VII-A,B | Control            | Myogenic         | 60 mmHg    | 15.2±4.8  | 5  | 3  | 28.5±7.6  | 5  | 3  |                                                         |                                                                                                                                                                                                                                                                                                                                                                                                                                                                                                                                                                  |
| Sup VII-A,B | Control            | Myogenic         | 80 mmHg    | 20.2±4.7  | 5  | 3  | 34.7±8.7  | 5  | 3  |                                                         |                                                                                                                                                                                                                                                                                                                                                                                                                                                                                                                                                                  |
| Sup VII-A,B | IAA-94             | Myogenic         | 20 mmHg    | 0.0±3.6   | 5  | 3  | 3.1±0.6   | 5  | 3  | Friedman Test (ZT11)                                    | ZT11 Friedman $\chi^2(3) = 1.14$ , p = 0.77; W <sub>ZT11,20(5)</sub> = 0.63, <b>p = 0.002</b> ; W <sub>ZT11,40(5)</sub> = 0.87, p = 0.26; W <sub>ZT11,60(5)</sub> = 0.98, p = 0.93; W <sub>ZT11,80(5)</sub> = 0.95, p = 0.74; Brown-Forsythe F(3,16) = 0.26, p = 0.850                                                                                                                                                                                                                                                                                           |
| Sup VII-A,B | IAA-94             | Myogenic         | 40 mmHg    | 0.7±1.7   | 5  | 3  | 2.1±0.6   | 5  | 3  |                                                         |                                                                                                                                                                                                                                                                                                                                                                                                                                                                                                                                                                  |
| Sup VII-A,B | IAA-94             | Myogenic         | 60 mmHg    | 1.5±1.9   | 5  | 3  | 1.8±1.2   | 5  | 3  |                                                         |                                                                                                                                                                                                                                                                                                                                                                                                                                                                                                                                                                  |
| Sup VII-A,B | IAA-94             | Myogenic         | 80 mmHg    | 1.9±2.3   | 5  | 3  | 1.4±1.8   | 5  | 3  |                                                         |                                                                                                                                                                                                                                                                                                                                                                                                                                                                                                                                                                  |
| Sup VII-A,B | IAA-94 Wash        | Myogenic         | 20 mmHg    | 2.3±1.4   | 5  | 3  | 6.1±2.9   | 5  | 3  | (ZT11) Repeated Measures ANOVA                          | ZT11 ANOVA F(3,12) = 69.90, <b>p &lt; 0.001</b> ; W <sub>ZT11,20(5)</sub> = 0.91, p = 0.45; W <sub>ZT11,40(5)</sub> = 0.88, p = 0.37; W <sub>ZT11,60(5)</sub> = 0.97, p = 0.89; W <sub>ZT11,80(5)</sub> = 0.96, p = 0.82; Brown-Forsythe F(3,16) = 0.84, p = 0.492                                                                                                                                                                                                                                                                                               |
| Sup VII-A,B | IAA-94 Wash        | Myogenic         | 40 mmHg    | 4.9±2.9   | 5  | 3  | 9.9±4.1   | 5  | 3  |                                                         |                                                                                                                                                                                                                                                                                                                                                                                                                                                                                                                                                                  |
| Sup VII-A,B | IAA-94 Wash        | Myogenic         | 60 mmHg    | 12.9±4.3  | 5  | 3  | 18.4±3.6  | 5  | 3  |                                                         |                                                                                                                                                                                                                                                                                                                                                                                                                                                                                                                                                                  |
| Sup VII-A,B | IAA-94 Wash        | Myogenic         | 80 mmHg    | 17.8±4.0  | 5  | 3  | 23.6±9.3  | 5  | 3  |                                                         |                                                                                                                                                                                                                                                                                                                                                                                                                                                                                                                                                                  |
| Sup VII-C,D | Control            | Phenylephrine    | 1 nmol/L   | 6.8±6.3   | 5  | 3  | 8.2±3.0   | 5  | 3  | Friedman Test (ZT11)                                    | ZT11 Friedman $\chi^2(4) = 17.48$ , <b>p = 0.002</b> ; W <sub>ZT11,1(5)</sub> = 0.94, <b>p = 0.65</b> ; W <sub>ZT11,8(5)</sub> = 0.87, p = 0.26; W <sub>ZT11,5(5)</sub> = 0.75, <b>p = 0.03</b> ; W <sub>ZT11,6(5)</sub> = 0.88, p = 0.29; W <sub>ZT11,9(5)</sub> = 0.78, p = 0.05; Brown-Forsythe F(4,20) = 1.01, p = 0.424                                                                                                                                                                                                                                     |
| Sup VII-C,D | Control            | Phenylephrine    | 10 nmol/L  | 6.2±7.0   | 5  | 3  | 8.2±3.2   | 5  | 3  |                                                         |                                                                                                                                                                                                                                                                                                                                                                                                                                                                                                                                                                  |
| Sup VII-C,D | Control            | Phenylephrine    | 100 nmol/L | 8.7±7.0   | 5  | 3  | 11.7±4.5  | 5  | 3  |                                                         |                                                                                                                                                                                                                                                                                                                                                                                                                                                                                                                                                                  |
| Sup VII-C,D | Control            | Phenylephrine    | 1 μmol/L   | 41.7±23.2 | 5  | 3  | 37.1±6.8  | 5  | 3  |                                                         |                                                                                                                                                                                                                                                                                                                                                                                                                                                                                                                                                                  |
| Sup VII-C,D | Control            | Phenylephrine    | 10 μmol/L  | 58.6±16.6 | 5  | 3  | 60.8±3.3  | 5  | 3  | Measures ANOVA                                          | ZT23 ANOVA F(4,16) = 203.70, <b>p &lt; 0.001</b> ; W <sub>ZT23,1(5)</sub> = 0.87, p = 0.27; W <sub>ZT23,8(5)</sub> = 0.94, p = 0.69; W <sub>ZT23,5(5)</sub> = 0.85, p = 0.18; W <sub>ZT23,6(5)</sub> = 0.93, p = 0.64; W <sub>ZT23,9(5)</sub> = 0.94, p = 0.63; Brown-Forsythe F(4,20) = 1.09, p = 0.390                                                                                                                                                                                                                                                         |
| Sup VII-C,D | IAA-94             | Phenylephrine    | 1 nmol/L   | 0.0±0.0   | 5  | 4  | 0.9±1.0   | 5  | 3  | Friedman Test (ZT11)                                    | ZT11 Friedman $\chi^2(4) = 13.96$ , <b>p = 0.007</b> ; W <sub>ZT11,1(5)</sub> = ND; W <sub>ZT11,8(5)</sub> = ND; W <sub>ZT11,5(5)</sub> = 0.55, <b>p &lt; 0.01</b> ; W <sub>ZT11,6(5)</sub> = 0.93, p = 0.62; W <sub>ZT11,9(5)</sub> = 0.88, p = 0.33; Brown-Forsythe F(4,20) = 3.88, <b>p = 0.02</b>                                                                                                                                                                                                                                                            |
| Sup VII-C,D | IAA-94             | Phenylephrine    | 10 nmol/L  | 0.0±0.0   | 5  | 4  | 0.0±1.7   | 5  | 3  |                                                         |                                                                                                                                                                                                                                                                                                                                                                                                                                                                                                                                                                  |
| Sup VII-C,D | IAA-94             | Phenylephrine    | 100 nmol/L | 0.0±0.4   | 5  | 4  | 0.7±2.4   | 5  | 3  |                                                         |                                                                                                                                                                                                                                                                                                                                                                                                                                                                                                                                                                  |
| Sup VII-C,D | IAA-94             | Phenylephrine    | 1 μmol/L   | 8.7±17.5  | 5  | 4  | 21.6±12.3 | 5  | 3  |                                                         |                                                                                                                                                                                                                                                                                                                                                                                                                                                                                                                                                                  |
| Sup VII-C,D | IAA-94             | Phenylephrine    | 10 μmol/L  | 41.7±30.3 | 5  | 4  | 46.4±19.1 | 5  | 3  | Friedman Test (ZT23)                                    | ZT23 Friedman $\chi^2(4) = 16.64$ , <b>p = 0.002</b> ; W <sub>ZT23,1(5)</sub> = 0.92, p = 0.55; W <sub>ZT23,8(5)</sub> = 0.76, <b>p = 0.04</b> ; W <sub>ZT23,5(5)</sub> = 0.85, p = 0.22; W <sub>ZT23,6(5)</sub> = 0.69, <b>p = 0.007</b> ; W <sub>ZT23,9(5)</sub> = 0.99, p = 0.97; Brown-Forsythe F(4,20) = 2.14, p = 0.113                                                                                                                                                                                                                                    |
| 5C          | ZT11+CFTR(inh)-172 | Myogenic         | 20 mmHg    | 5.3±2.6   | 5  | 5  | 4.8±3.9   | 5  | 5  | Repeated 2-Way ANOVA with Geisser-Greenhouse correction | Transmural Pressure (Repeated Measures): F(2.06, 8.23) = 15.26, <b>p &lt; 0.001</b> ; CFTR(inh)-172 (Repeated Measures): F(1, 4) = 8.85, <b>p = 0.01</b> ; W <sub>Con,20(5)</sub> = 0.97, p = 0.91; W <sub>Inh,20(5)</sub> = 0.87, p = 0.28; W <sub>Con,40(5)</sub> = 0.96, p = 0.83; W <sub>Inh,40(5)</sub> = 0.89, p = 0.36; W <sub>Con,60(5)</sub> = 0.82, p = 0.12; W <sub>Inh,60(5)</sub> = 0.78, p = 0.06; W <sub>Con,80(5)</sub> = 0.95, p = 0.73; W <sub>Inh,80(5)</sub> = 0.96, p = 0.81; Brown-Forsythe F(7,32) = 0.12, p = 0.996                      |
| 5C          | ZT11+CFTR(inh)-172 | Myogenic         | 40 mmHg    | 7.9±3.1   | 5  | 5  | 5.1±3.0   | 5  | 5  |                                                         |                                                                                                                                                                                                                                                                                                                                                                                                                                                                                                                                                                  |
| 5C          | ZT11+CFTR(inh)-172 | Myogenic         | 60 mmHg    | 13.0±3.6  | 5  | 5  | 8.0±3.8   | 5  | 5  |                                                         |                                                                                                                                                                                                                                                                                                                                                                                                                                                                                                                                                                  |
| 5C          | ZT11+CFTR(inh)-172 | Myogenic         | 80 mmHg    | 16.4±3.6  | 5  | 5  | 11.9±3.3  | 5  | 5  |                                                         |                                                                                                                                                                                                                                                                                                                                                                                                                                                                                                                                                                  |
| 5D          | ZT23+CFTR(inh)-172 | Myogenic         | 20 mmHg    | 5.7±1.9   | 5  | 4  | 8.1±1.3   | 5  | 4  | Repeated 2-Way ANOVA with Geisser-Greenhouse correction | Transmural Pressure (Repeated Measures): F(1.23, 4.51) = 37.30, <b>p = 0.002</b> ; CFTR(inh)-172 (Repeated Measures): F(1, 4) = 0.17, p = 0.70; W <sub>Con,20(5)</sub> = 0.81, p = 0.11; W <sub>Inh,20(5)</sub> = 0.96, p = 0.82; W <sub>Con,40(5)</sub> = 0.82, p = 0.12; W <sub>Inh,40(5)</sub> = 0.80, p = 0.08; W <sub>Con,60(5)</sub> = 0.82, p = 0.12; W <sub>Inh,60(5)</sub> = 0.99, p = 0.98; W <sub>Con,80(5)</sub> = 0.81, p = 0.10; W <sub>Inh,80(5)</sub> = 0.95, p = 0.71; Brown-Forsythe F(7,32) = 0.63, p = 0.728                                 |
| 5D          | ZT23+CFTR(inh)-172 | Myogenic         | 40 mmHg    | 10.6±2.7  | 5  | 4  | 12.0±2.3  | 5  | 4  |                                                         |                                                                                                                                                                                                                                                                                                                                                                                                                                                                                                                                                                  |
| 5D          | ZT23+CFTR(inh)-172 | Myogenic         | 60 mmHg    | 17.2±3.6  | 5  | 4  | 17.3±4.7  | 5  | 4  |                                                         |                                                                                                                                                                                                                                                                                                                                                                                                                                                                                                                                                                  |
| 5D          | ZT23+CFTR(inh)-172 | Myogenic         | 80 mmHg    | 23.3±3.8  | 5  | 4  | 22.1±5.5  | 5  | 4  |                                                         |                                                                                                                                                                                                                                                                                                                                                                                                                                                                                                                                                                  |

Non-highlighted data sets are means ± standard error of the mean; blue-highlighted data sets were subjected to non-parametric statistical analyses and are medians ± interquartile range. Column “n” refers to the number



**Supplemental Table VI: Article Figure Data and Normality/Variance Statistics – Constant Dark Circadian Rhythm Assessments.**

| Zeitgeber Time        | CFTR      | n                         | Shapiro-Wilk          | Bmal1       | n                         | Shapiro-Wilk                 | Per2      | n                         | Shapiro-Wilk                 |  |
|-----------------------|-----------|---------------------------|-----------------------|-------------|---------------------------|------------------------------|-----------|---------------------------|------------------------------|--|
| 19                    | 0.97±0.54 | 4                         | W(4) = 0.96, p = 0.75 | 3.85±3.54   | 4                         | W(4) = 0.88, p = 0.36        | 1.65±2.50 | 4                         | W(4) = 0.91, p = 0.47        |  |
| 23                    | 1.15±0.90 | 4                         | W(4) = 0.96, p = 0.75 | 9.35±8.37   | 4                         | W(4) = 0.94, p = 0.68        | 1.21±1.89 | 4                         | W(4) = 0.98, p = 0.91        |  |
| 27                    | 1.39±0.86 | 4                         | W(4) = 0.96, p = 0.75 | 10.14±4.37  | 4                         | W(4) = 0.96, p = 0.81        | 0.88±0.68 | 4                         | W(4) = 0.85, p = 0.24        |  |
| 31                    | 1.98±0.26 | 4                         | W(4) = 0.96, p = 0.75 | 2.59±6.79   | 4                         | W(4) = 0.79, p = 0.09        | 3.72±2.09 | 4                         | W(4) = 0.79, p = 0.08        |  |
| 35                    | 2.43±0.39 | 4                         | W(4) = 0.96, p = 0.75 | 1.14±0.47   | 4                         | W(4) = 0.69, <b>p = 0.01</b> | 6.14±2.55 | 4                         | W(4) = 0.93, p = 0.60        |  |
| 39                    | 2.13±0.93 | 4                         | W(4) = 0.96, p = 0.75 | 2.57±1.60   | 4                         | W(4) = 0.79, p = 0.09        | 6.83±1.76 | 4                         | W(4) = 0.97, p = 0.87        |  |
| 43                    | 0.94±0.53 | 3                         | W(4) = 0.96, p = 0.75 | 7.51±6.79   | 3                         | W(4) = 0.98, p = 0.92        | 1.18±0.56 | 4                         | W(4) = 0.93, p = 0.58        |  |
| 47                    | 1.38±1.80 | 3                         | W(4) = 0.96, p = 0.75 | 14.64±19.67 | 3                         | W(4) = 0.93, p = 0.57        | 2.28±2.58 | 4                         | W(4) = 0.91, p = 0.46        |  |
| 51                    | 1.12±0.71 | 4                         | W(4) = 0.96, p = 0.75 | 12.59±5.89  | 4                         | W(4) = 0.86, p = 0.27        | 0.98±0.48 | 4                         | W(4) = 0.99, p = 0.95        |  |
| 55                    | 1.66±0.19 | 4                         | W(4) = 0.96, p = 0.75 | 3.39±1.42   | 4                         | W(4) = 0.99, p = 0.97        | 3.08±1.22 | 4                         | W(4) = 0.84, p = 0.20        |  |
| 59                    | 1.40±0.68 | 4                         | W(4) = 0.96, p = 0.75 | 1.02±0.76   | 4                         | W(4) = 1.00, p = 0.99        | 4.27±2.05 | 4                         | W(4) = 0.98, p = 0.91        |  |
| 63                    | 1.47±0.12 | 4                         | W(4) = 0.96, p = 0.75 | 3.94±5.13   | 4                         | W(4) = 0.88, p = 0.32        | 4.91±6.57 | 4                         | W(4) = 0.69, <b>p = 0.01</b> |  |
| <b>Brown-Forsythe</b> |           | F(11,36) = 2.01, p = 0.06 |                       |             | F(11,36) = 1.96, p = 0.06 |                              |           | F(11,36) = 0.75, p = 0.68 |                              |  |

Data are medians ± interquartile range. Column “n” refers to the number of samples assessed, with 1 mouse utilized per sample.

*Abbreviations:* sm-Bmal1 KO = smooth muscle specific Bmal1 1 knockout; WT + Lum = wild type mice treated with 3mg/kg/day lumacaftor for 2 days prior to experimental assessment; WT/Cre = tamoxifen treated, Cre-expressing wild-type control; ZT = Zeitgeber time.

**Supplemental Table VII: JTK\_Cycle Analyses.**

| Figure   | Genotype    | Parameter               | Level          | Adjusted P         | Period | Acrophase | Amplitude | n    |
|----------|-------------|-------------------------|----------------|--------------------|--------|-----------|-----------|------|
| 1A       | Wild-Type   | Myogenic                | 20 mmHg        | <b>0.008 *</b>     | 24     | 22        | 3.465     | 6-8  |
| 1A       | Wild-Type   | Myogenic                | 40 mmHg        | <b>0.005 *</b>     | 24     | 22        | 4.936     | 6-8  |
| 1A       | Wild-Type   | Myogenic                | 60 mmHg        | <b>0.002 *</b>     | 24     | 22        | 4.504     | 6-8  |
| 1A       | Wild-Type   | Myogenic                | 80 mmHg        | <b>0.020 *</b>     | 24     | 22        | 3.670     | 6-8  |
| 1B       | Wild-Type   | Phenylephrine           | 1 nmol/L       | 1.000              | 24     | 22        | 2.072     | 5-8  |
| 1B       | Wild-Type   | Phenylephrine           | 10 nmol/L      | 0.717              | 20     | 2         | 0.049     | 5-8  |
| 1B       | Wild-Type   | Phenylephrine           | 100 nmol/L     | 0.332              | 28     | 20        | 0.000     | 5-8  |
| 1B       | Wild-Type   | Phenylephrine           | 1 $\mu$ mol/L  | 1.000              | 24     | 0         | 5.296     | 5-8  |
| 1B       | Wild-Type   | Phenylephrine           | 10 $\mu$ mol/L | 0.566              | 20     | 2         | 1.948     | 5-8  |
| 1C       | sm-Bmal1 KO | Myogenic                | 20 mmHg        | 1.000              | 24     | 12        | 0.636     | 5-11 |
| 1C       | sm-Bmal1 KO | Myogenic                | 40 mmHg        | 1.000              | 20     | 6         | 1.980     | 5-11 |
| 1C       | sm-Bmal1 KO | Myogenic                | 60 mmHg        | 0.736              | 20     | 8         | 1.556     | 5-11 |
| 1C       | sm-Bmal1 KO | Myogenic                | 80 mmHg        | 1.000              | 20     | 4         | 3.748     | 5-11 |
| 1D       | sm-Bmal1 KO | Phenylephrine           | 1 nmol/L       | 1.000              | 20     | 12        | 1.626     | 5-11 |
| 1D       | sm-Bmal1 KO | Phenylephrine           | 10 nmol/L      | 1.000              | 24     | 12        | 1.768     | 5-11 |
| 1D       | sm-Bmal1 KO | Phenylephrine           | 100 nmol/L     | 0.736              | 24     | 10        | 1.131     | 5-11 |
| 1D       | sm-Bmal1 KO | Phenylephrine           | 1 $\mu$ mol/L  | 0.164              | 24     | 10        | 5.869     | 5-11 |
| 1D       | sm-Bmal1 KO | Phenylephrine           | 10 $\mu$ mol/L | 0.555              | 24     | 10        | 2.351     | 5-11 |
| 5A       | Wild-Type   | CFTR mRNA               | --             | <b>0.005 *</b>     | 24     | 10        | 0.283     | 4    |
| 5C       | WT + Lum    | Myogenic                | 20 mmHg        | 1.000              | 24     | 12        | 0.495     | 5-6  |
| 5C       | WT + Lum    | Myogenic                | 40 mmHg        | 1.000              | 20     | 0         | 0.566     | 5-6  |
| 5C       | WT + Lum    | Myogenic                | 60 mmHg        | 1.000              | 20     | 0         | 0.530     | 5-6  |
| 5C       | WT + Lum    | Myogenic                | 80 mmHg        | 1.000              | 20     | 0         | 1.768     | 5-6  |
| Sup V-A  | Wild-Type   | Sphk1 mRNA              | --             | 1.000              | 20     | 16        | 0.255     | 2-3  |
| Sup V-B  | Wild-Type   | S1P <sub>2</sub> R mRNA | --             | 1.000              | 24     | 18        | 0.092     | 3-4  |
| Sup V-C  | Wild-Type   | Bmal1 mRNA              | --             | <b>&lt;0.001 *</b> | 24     | 20        | 8.195     | 3    |
| Sup V-D  | Wild-Type   | Per2 mRNA               | --             | <b>&lt;0.001 *</b> | 24     | 12        | 2.758     | 3    |
| Sup V-E  | Wild-Type   | Clock mRNA              | --             | <b>0.007 *</b>     | 24     | 18        | 0.346     | 3    |
| Sup VI-A | Wild-Type   | CFTR mRNA               | --             | <b>0.005 *</b>     | 28     | 16        | 0.723     | 4    |
| Sup VI-B | Wild-Type   | Bmal1 mRNA              | --             | <b>&lt;0.001 *</b> | 24     | 6         | 4.671     | 4    |
| Sup VI-C | Wild-Type   | Per2 mRNA               | --             | <b>&lt;0.001 *</b> | 28     | 18        | 2.298     | 4    |
| Sup VIII | WT + Lum    | Phenylephrine           | 1 nmol/L       | 1.000              | 24     | 10        | 0.354     | 5-6  |
| Sup VIII | WT + Lum    | Phenylephrine           | 10 nmol/L      | 1.000              | 24     | 6         | 0.424     | 5-6  |
| Sup VIII | WT + Lum    | Phenylephrine           | 100 nmol/L     | 1.000              | 24     | 6         | 0.778     | 5-6  |
| Sup VIII | WT + Lum    | Phenylephrine           | 1 $\mu$ mol/L  | 1.000              | 24     | 12        | 1.980     | 5-6  |
| Sup VIII | WT + Lum    | Phenylephrine           | 10 $\mu$ mol/L | 1.000              | 20     | 2         | 2.652     | 5-6  |

*Adjusted P* is the Bonferroni-adjusted minimal P value calculated by JTK\_CYCLE. *Acrophase* is the Zeitgeber time of the sinusoidal rhythm peak calculated by JTK\_CYCLE. \* denotes a statistically significant circadian rhythm; n refers to the number of samples at each Zeitgeber time point.

*Abbreviations:* sm-Bmal1 KO = smooth muscle specific Bmal1 1 knockout; WT + Lum = wild type mice treated with 3mg/kg/day lumacaftor for 2 days prior to experimental assessment.

## \* Preclinical Checklist

*Preclinical Checklist: Prevention of bias is important for experimental cardiovascular research. **This short checklist must be completed, and the answers should be clearly presented in the manuscript.** The checklist will be used by reviewers and editors and it will be published. See ["Reporting Standard for Preclinical Studies of Stroke Therapy"](#) and ["Good Laboratory Practice: Preventing Introduction of Bias at the Bench"](#) for more information.*

This study involves animal models:

Yes

### Experimental groups and study timeline

The experimental group(s) have been clearly defined in the article, including number of animals in each experimental arm of the study: Yes

An account of the control group is provided, and number of animals in the control group has been reported. If no controls were used, the rationale has been stated: Yes

An overall study timeline is provided: Yes

### Inclusion and exclusion criteria

A priori inclusion and exclusion criteria for tested animals were defined and have been reported in the article: Yes

### Randomization

Animals were randomly assigned to the experimental groups. If the work being submitted does not contain multiple experimental groups, or if random assignment was not used, adequate explanations have been provided: Yes

Type and methods of randomization have been described: Yes

Methods used for allocation concealment have been reported: N/A

### Blinding

Blinding procedures have been described with regard to masking of group/treatment assignment from the experimenter. The rationale for nonblinding of the experimenter has been provided, if such was not feasible: Yes

Blinding procedures have been described with regard to masking of group assignment during outcome assessment: Yes

### Sample size and power calculations

Formal sample size and power calculations were conducted based on a priori determined outcome(s) and treatment effect, and the data have been reported. A formal size assessment was not conducted and a rationale has been provided: Yes

### Data reporting and statistical methods

Number of animals in each group: randomized, tested, lost to follow-up, or died have been reported. If the experimentation involves repeated measurements, the number of animals assessed at each time point is provided, for all experimental groups: Yes

Baseline data on assessed outcome(s) for all experimental groups have been reported: Yes

Details on important adverse events and death of animals during the course of experimentation have been provided, for all experimental arms: Yes

Statistical methods used have been reported: Yes

Numeric data on outcomes have been provided in text, or in a tabular format with the main article or as supplementary tables, in addition to the figures: Yes

### Experimental details, ethics, and funding statements

Details on experimentation including stroke model, formulation and dosage of therapeutic agent, site and route of administration, use of anesthesia and analgesia, temperature control during experimentation, and postprocedural monitoring have been described: Yes

Different sex animals have been used. If not, the reason/justification is provided: Yes

Statements on approval by ethics boards and ethical conduct of studies have been provided: Yes

Statements on funding and conflicts of interests have been provided: Yes

---

Date completed: 10/05/2021 19:42:02

User pid: 7349
